# Supplementary material for: The multifunctional role of ionic liquids in the formation of epoxy-silica nanocomposites
Source: Royal Society of Chemistry journal article supplement (doi:10.1039/c1jm11752a), 2011-01-01
Supplement: c1jm11752a.pdf [file c1jm11752a.pdf]

# **The multifunctional role of ionic liquids in the formation of polymer nanocomposites**

**Ricardo Keitel Donato, Libor Matějka,\* Henri S. Schrekker, Josef Pleštil,  
Alexander Jigounov, Jiří Brus and Miroslav Šlouf**

## **Supplementary Information**

*1-Triethylene glycol monomethyl ether-3-methylimidazolium methanesulfonate.*  
 $^1\text{H}$  NMR (300.0 MHz,  $\text{CDCl}_3$ , 298 K)  $\delta$  9.62 (bs, 1H), 7.66 (bs, 1H), 7.47 (bs, 1H), 4.54 (t,  $J=4.7$ , 2H), 4.02 (s, 3H), 3.88 (t,  $J=4.7$ , 2H), 3.67-3.60 (m, 6H), 3.57-3.53 (m, 2H), 3.38 (s, 3H), 2.85 (s, 3H);  $^{13}\text{C}\{^1\text{H}\}$  NMR (75.4 MHz,  $\text{CDCl}_3$ , 298 K)  $\delta$  137.6 (CH), 123.2 (CH), 122.8 (CH), 71.5 ( $\text{CH}_2$ ), 70.0 ( $\text{CH}_2$ ), 69.9 ( $\text{CH}_2$ ), 69.8 ( $\text{CH}_2$ ), 68.7 ( $\text{CH}_2$ ), 58.6 ( $\text{CH}_3$ ), 49.2 ( $\text{CH}_2$ ), 39.4 ( $\text{CH}_3$ ), 35.9 ( $\text{CH}_3$ ).

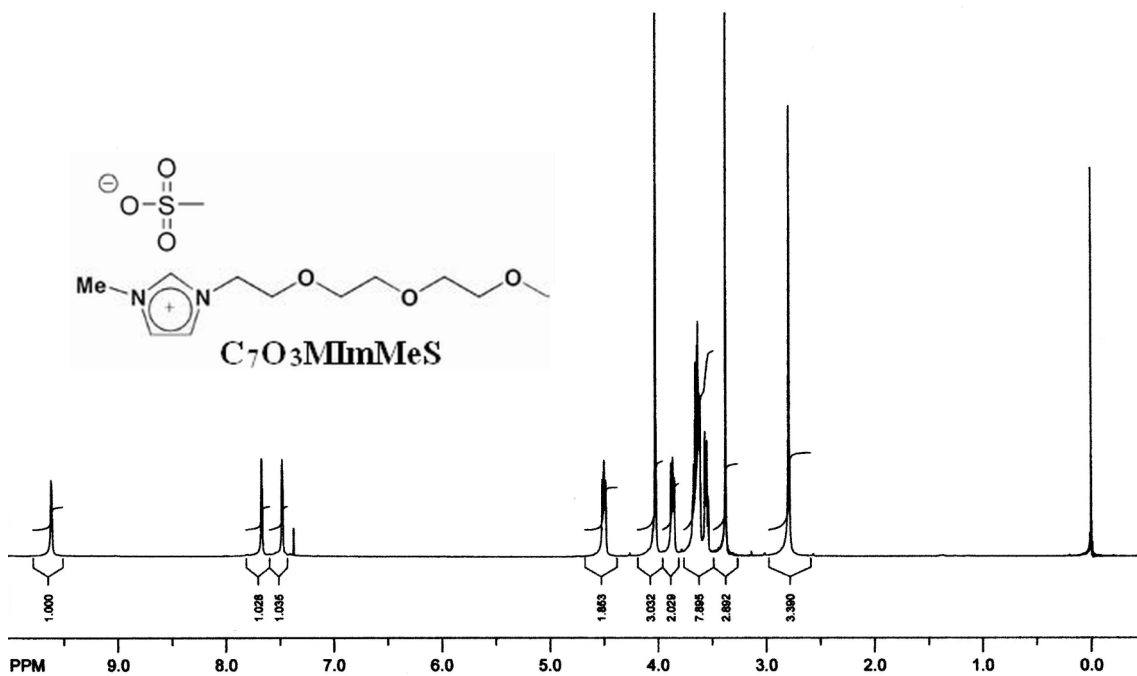

**Figure S1.**  $^1\text{H}$  NMR spectrum of 1-triethylene glycol monomethyl ether-3-methylimidazolium methanesulfonate ( $\text{C}_7\text{O}_3\text{MImMeS}$ ) (300 MHz,  $\text{CDCl}_3$ ).

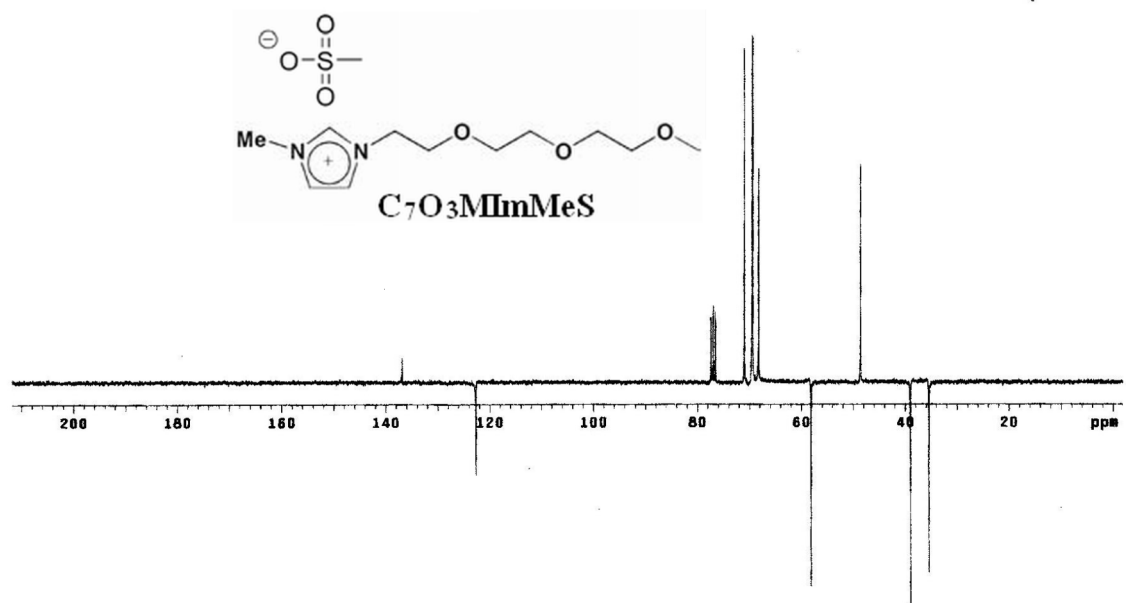

**Figure S2.**  $^{13}\text{C}$  NMR spectrum of 1-triethylene glycol monomethyl ether-3-methylimidazolium methanesulfonate ( $\text{C}_7\text{O}_3\text{MImMeS}$ ) (75 MHz,  $\text{CDCl}_3$ ).

*1-Triethylene glycol monomethyl ether-3-methylimidazolium tetrafluoroborate.*  
 $^1\text{H}$  NMR (300.0 MHz,  $\text{d}_6$ -acetone, 298 K)  $\delta$  9.00 (bs, 1H), 7.77 (bs, 1H), 7.68 (bs, 1H), 4.52 (t,  $J = 4.8$ , 2H), 4.07 (s, 3H), 3.92 (t,  $J = 4.8$ , 2H), 3.68-3.48 (m, 8H), 3.31 (s, 3H);  
 $^{13}\text{C}\{^1\text{H}\}$  NMR (75.4 MHz,  $\text{d}_6$ -acetone, 298 K)  $\delta$  138.5 (CH), 124.8 (CH), 124.5 (CH), 73.1 ( $\text{CH}_2$ ), 71.4 ( $2\times\text{CH}_2$ ), 71.3 ( $\text{CH}_2$ ), 69.9 ( $\text{CH}_2$ ), 59.3 ( $\text{CH}_3$ ), 50.7 ( $\text{CH}_2$ ), 37.0 ( $\text{CH}_3$ ).

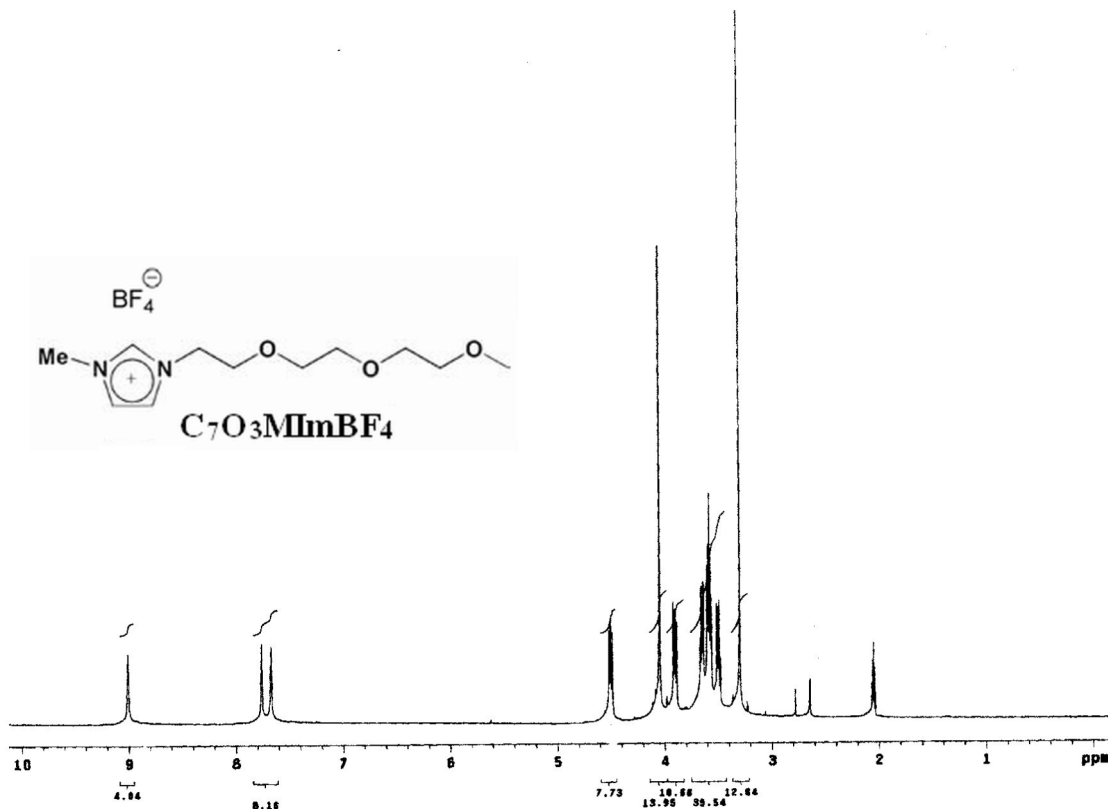

**Figure S3.**  $^1\text{H}$  NMR spectrum of 1-triethylene glycol monomethyl ether-3-methylimidazolium tetrafluoroborate ( $\text{C}_7\text{O}_3\text{MImBF}_4$ ) (300 MHz,  $\text{d}_6$ -acetone).

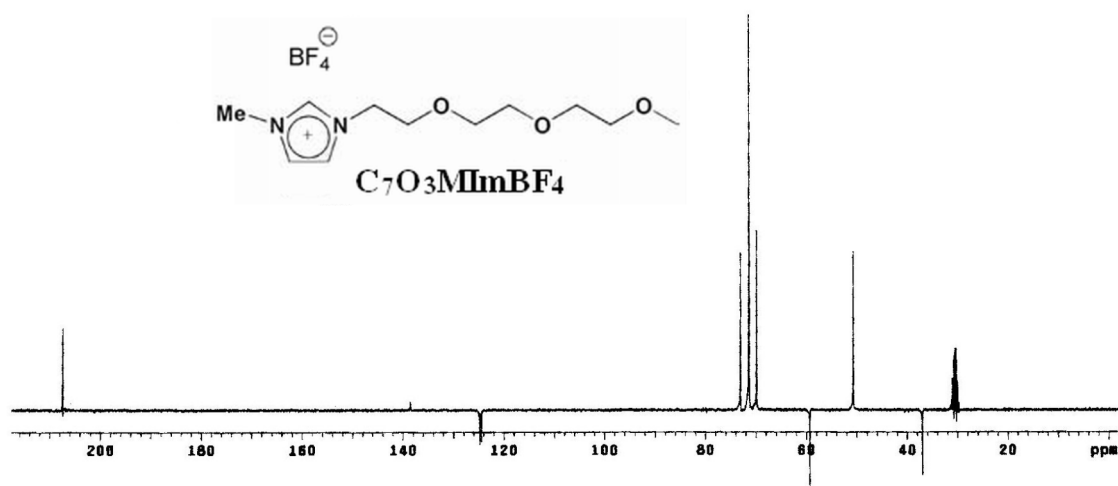

**Figure S4.**  $^{13}\text{C}$  NMR spectrum of 1-triethylene glycol monomethyl ether-3-methylimidazolium tetrafluoroborate ( $\text{C}_7\text{O}_3\text{MImBF}_4$ ) (75 MHz,  $\text{d}_6$ -acetone).

*1-Decyl-3-methylimidazolium tetrafluoroborate.*  $^1\text{H}$  NMR (300.0 MHz,  $\text{CDCl}_3$ , 298 K)  $\delta$  9.02 (bs, 1H), 7.77 (m, 1H), 7.71 (m, 1H), 4.36 (t,  $J = 7.3$ , 2H), 4.05 (s, 3H), 1.95 (m, 2H), 1.36-1.27 (m, 14H), 0.87 (t,  $J = 6.6$ , 3H);  $^{13}\text{C}\{^1\text{H}\}$  NMR (75.4 MHz,  $\text{CDCl}_3$ , 298 K)  $\delta$  137.8 (CH), 124.9 (CH), 123.6 (CH), 50.6 ( $\text{CH}_2$ ), 36.7 ( $\text{CH}_3$ ), 32.9 ( $\text{CH}_2$ ), 31.1 ( $\text{CH}_2$ ), 30.5 ( $\text{CH}_2$ ), 30.4 ( $\text{CH}_2$ ), 30.3 ( $\text{CH}_2$ ), 30.0 ( $\text{CH}_2$ ), 27.1 ( $\text{CH}_2$ ), 23.6 ( $\text{CH}_2$ ), 14.7 ( $\text{CH}_3$ ).

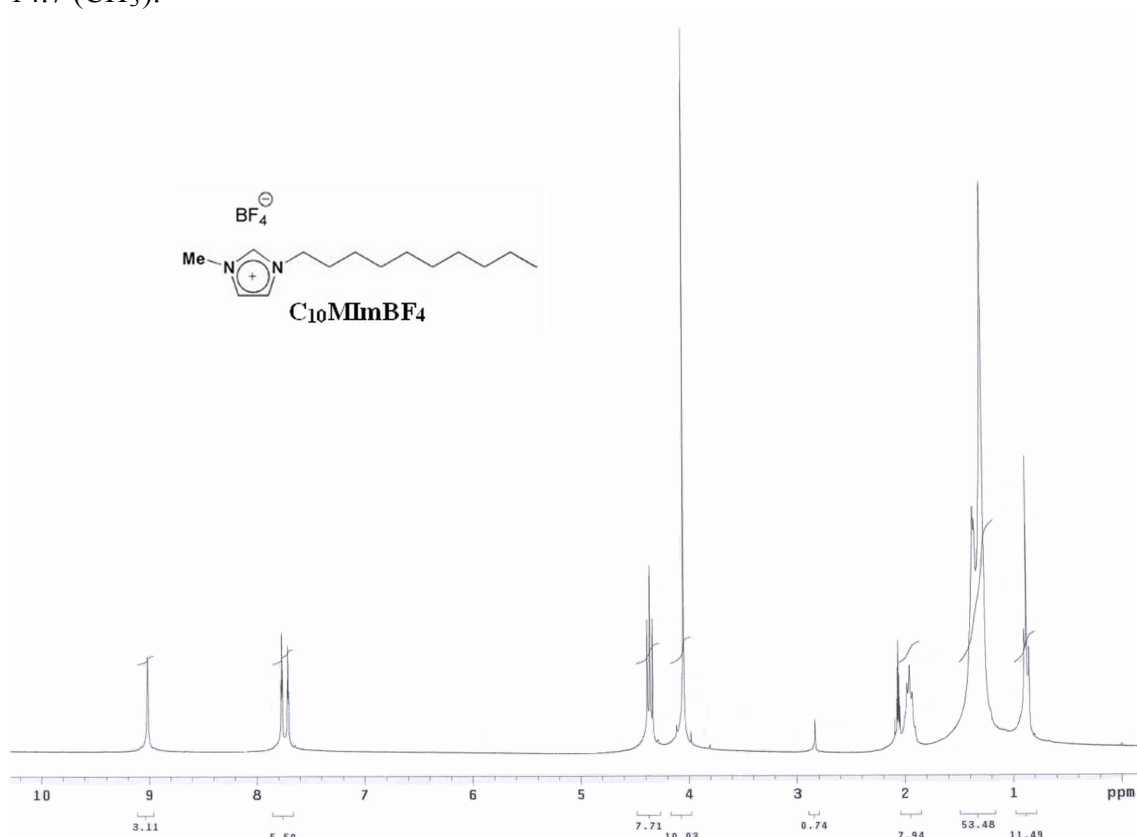

**Figure S5.**  $^1\text{H}$  NMR spectrum of 1-decyl-3-methylimidazolium tetrafluoroborate ( $\text{C}_{10}\text{MImBF}_4$ ) (300 MHz,  $d_6$ -acetone).

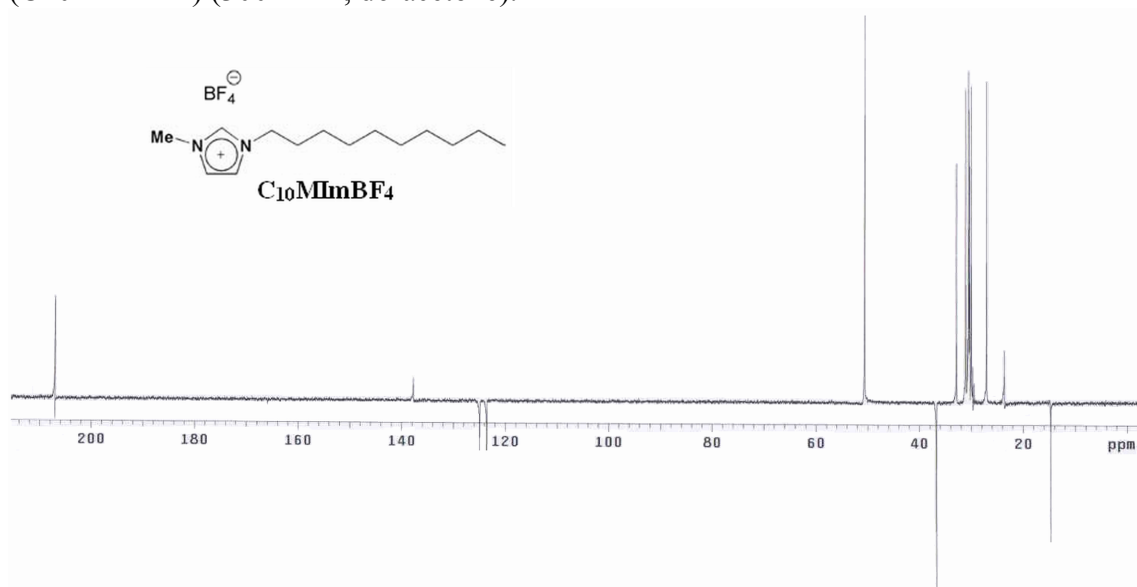

**Figure S6.**  $^{13}\text{C}$  NMR spectrum of ionic 1-decyl-3-methylimidazolium tetrafluoroborate ( $\text{C}_{10}\text{MImBF}_4$ ) (75 MHz,  $d_6$ -acetone).
